# Supplementary material for: Assessment of Racial and Ethnic Disparities in the Use of Medication to Treat Opioid Use Disorder Among Pregnant Women in Massachusetts
Source: PubMed Central journal article supplement (PMC7251447; doi:10.1001/jamanetworkopen.2020.5734), 2020-05-26
Supplement: jamanetwopen-3-e205734-s001.pdf [file jamanetwopen-3-e205734-s001.pdf]

## Supplementary Online Content

Schiff DM, Nielsen T, Hoepfner BB, et al. Assessment of racial and ethnic disparities in the use of medication to treat opioid use disorder among pregnant women in Massachusetts. *JAMA Netw Open*. 2020;3(5):e205734. doi:10.1001/jamanetworkopen.2020.5734

**eTable 1.** *ICD-9-CM* and *ICD-10-CM* Codes Used for Identification

**eTable 2.** Data Sources

**eTable 3.** Characteristics of Mothers with Opioid Use Disorder by Inclusion/Exclusion Criteria (N = 5776)

**eTable 4.** Characteristics of Mothers with Opioid Use Disorder by Treatment Category During Pregnancy (N = 5247)

**eTable 5.** Characteristics of Mothers Receiving Medication for Opioid Use Disorder by Medication Type (n = 3471)

**eTable 6.** Unadjusted and Adjusted Odds of Use and Type of Medication for Opioid Use Disorder (Sensitivity Analysis—No NAS Only)

**eTable 7.** Unadjusted and Adjusted Odds of Use and Type of Medication for Opioid Use Disorder (Sensitivity Analysis—No Exclusions)

**eTable 8.** Sensitivity Analysis #3: Adjusted Odds of Type of Medication for Opioid Use Disorder, Excluding Women Who Received Both Methadone and Buprenorphine (Main Study Cohort, N = 5247)

This supplementary material has been provided by the authors to give readers additional information about their work.

**eTable 1.** *ICD-9-CM* and *ICD-10-CM* Codes Used for Identification

| Characteristic                                | ICD-9-CM                                 | ICD-10-CM                                                                                                                                                                                                                                                                                                |
|-----------------------------------------------|------------------------------------------|----------------------------------------------------------------------------------------------------------------------------------------------------------------------------------------------------------------------------------------------------------------------------------------------------------|
| Opioid Use Disorder<br>(abuse and dependence) | 30400-30403, 30470-30473,<br>30550-30553 | F1120, F1121, F1110, F11120-F11122, F11129, F1114, F11150,<br>F11151, F11159, F11181, F11182, F11188, F1119-F11222,<br>F11229, F1123, F1124, F11250, F11251, F11259, F11281,<br>F11282, F11288, F1129, F1190-F11922, F11929, F11913,<br>F11914, F11950, F11951, F11959, F11981, F11982, F11989,<br>F1199 |
| Overdose Encounters                           | 96500-96502, 96509, E8500-<br>E8502      |                                                                                                                                                                                                                                                                                                          |
| NAS diagnosis                                 | 7795, 76062, 76072                       | P961, P0449                                                                                                                                                                                                                                                                                              |

**eTable 2. Data Sources**

A. Contribution of each data source in cohort identification among those included in cohort (n=5,247)

|                                                                        | All            | Unique<br>(delivery with only 1 source) |
|------------------------------------------------------------------------|----------------|-----------------------------------------|
| OU code and/or endocarditis, skin/soft tissue infection, osteomyelitis | 3,407 (64.93%) | 309 (17.84%)                            |
| Overdose code                                                          | 102 (1.94%)    | 15 (0.87%)                              |
| Publicly-funded opioid tx program enrollment                           | 1,418 (27.02%) | 120 (6.93%)                             |
| Methadone                                                              | 1,719 (32.76%) | 175 (10.10%)                            |
| Buprenorphine                                                          | 2,037 (38.82%) | 347 (20.03%)                            |
| NAS                                                                    | 2,889 (55.06%) | 766 (44.23%)                            |

B. Number of identifying sources for each delivery in cohort

| Total Sources of OUD Identification |              |
|-------------------------------------|--------------|
| 1                                   | 1,732        |
| 2                                   | 1,522        |
| 3                                   | 1,312        |
| 4                                   | 552          |
| 5 or more                           | 129          |
| <b>Total</b>                        | <b>5,247</b> |

C. Mean number of identifying sources for each delivery by race/ethnicity

| Total Sources by Race/Ethnicity |      |     |        |     |     |     |
|---------------------------------|------|-----|--------|-----|-----|-----|
|                                 | Mean | SD  | Median | IQR | Min | Max |
| WNH                             | 2.3  | 1.1 | 2      | 2   | 1   | 6   |
| BNH                             | 1.8  | 1.1 | 1      | 1   | 1   | 5   |
| HISP                            | 1.9  | 1.1 | 1      | 2   | 1   | 5   |

OU=Opioid Use Disorder, Tx = treatment, WNH = white non-Hispanic, BNH = black non-Hispanic, HISP = Hispanic

**eTable 3.** Characteristics of Mothers with Opioid Use Disorder by Inclusion/Exclusion Criteria (N = 5776)

|                                                                              | Included in final sample |              | Excluded from final sample |              |                                          |           |
|------------------------------------------------------------------------------|--------------------------|--------------|----------------------------|--------------|------------------------------------------|-----------|
|                                                                              | (n = 5,247)              |              | (n = 529)                  |              |                                          |           |
|                                                                              | OUD evidence             | NAS Only     | Iatrogenic NAS             | Chronic Pain | No clinical indication for medication Tx | P-Value   |
|                                                                              | (n = 4,481)              | (n=766)      | (n=79)                     | (n=87)       | (n=363)                                  | (5 group) |
| <b>Demographics</b>                                                          |                          |              |                            |              |                                          |           |
| Maternal Age                                                                 |                          |              |                            |              |                                          | <0.001    |
| ≤ 25 years old                                                               | 1,247 (27.83%)           | 243 (31.72%) | 19 (24.05%)                | *            | 113 (31.13%)                             |           |
| 26-34 years old                                                              | 2,674 (59.67%)           | 378 (49.35%) | 38 (48.10%)                | 47 (54.02%)  | 204 (56.20%)                             |           |
| ≥ 35 years old                                                               | 560 (12.50%)             | 145 (18.93%) | 22 (27.85%)                | *            | 46 (12.67%)                              |           |
| Maternal Race/Ethnicity                                                      |                          |              |                            |              |                                          | <0.001    |
| White non-Hispanic                                                           | 4,001 (89.29%)           | 550 (71.80%) | 47 (59.49%)                | 65 (74.71%)  | 308 (84.85%)                             |           |
| Black non-Hispanic                                                           | 159 (3.55%)              | 75 (9.79%)   | 13 (16.46%)                | *            | 17 (4.68%)                               |           |
| Hispanic                                                                     | 321 (7.16%)              | 141 (18.41%) | 19 (24.05%)                | *            | 38 (10.47%)                              |           |
| Maternal Education                                                           |                          |              |                            |              |                                          | <0.001    |
| High school or less                                                          | 2,425 (54.12%)           | 387 (50.52%) | 36 (45.57%)                | 30 (34.48%)  | 174 (47.93%)                             |           |
| Some college or more                                                         | 2,056 (45.88%)           | 379 (49.48%) | 41 (51.90%)                | 56 (64.37%)  | 189 (52.07%)                             |           |
| MassHealth Delivery                                                          |                          |              |                            |              |                                          | <0.001    |
| Yes                                                                          | 4,139 (92.37%)           | 567 (74.02%) | 59 (74.68%)                | 67 (77.01%)  | 307 (84.57%)                             |           |
| No                                                                           | 342 (7.63%)              | 199 (25.98%) | 20 (25.32%)                | 20 (22.99%)  | 56 (15.43%)                              |           |
| Marital Status                                                               |                          |              |                            |              |                                          | <0.001    |
| Married                                                                      | 718 (16.02%)             | 196 (25.59%) | 33 (41.77%)                | 30 (34.48%)  | 97 (26.72%)                              |           |
| Unmarried                                                                    | 3,763 (83.98%)           | 570 (74.41%) | 45 (56.96%)                | 57 (65.52%)  | 266 (73.28%)                             |           |
| Rural/Urban Residence                                                        |                          |              |                            |              |                                          | 0.04      |
| Urban                                                                        | 4,001 (89.29%)           | 709 (92.56%) | *                          | *            | 331 (91.18%)                             |           |
| Rural                                                                        | 480 (10.71%)             | 57 (7.44%)   | *                          | *            | 32 (8.82%)                               |           |
| <b>Psychosocial Characteristics and Health Care Utilization in Pregnancy</b> |                          |              |                            |              |                                          |           |
| ED Visits                                                                    |                          |              |                            |              |                                          | <0.001    |
| 3 or More                                                                    | 848 (18.92%)             | 94 (12.27%)  | *                          | 13 (14.94%)  | 41 (11.29%)                              |           |
| < 3 visits                                                                   | 3,633 (81.08%)           | 672 (87.73%) | *                          | 74 (85.06%)  | 322 (88.71%)                             |           |
| Anxiety Diagnosis                                                            |                          |              |                            |              |                                          | <0.001    |

|                                                                  |                |               |              |              |               |        |
|------------------------------------------------------------------|----------------|---------------|--------------|--------------|---------------|--------|
| Yes                                                              | 1,135 (25.33%) | 152 (19.84%)  | 19 (24.05%)  | 32 (36.78%)  | 110 (30.30%)  |        |
| No                                                               | 3,346 (74.67%) | 614 (80.16%)  | 60 (75.95%)  | 55 (63.22%)  | 253 (69.70%)  |        |
| Depression Diagnosis                                             |                |               |              |              |               | <0.001 |
| Yes                                                              | 1,297 (28.94%) | 185 (24.15%)  | 22 (27.85%)  | 33 (37.93%)  | 129 (35.54%)  |        |
| No                                                               | 3,184 (71.06%) | 581 (75.85%)  | 57 (72.15%)  | 54 (62.07%)  | 234 (64.46%)  |        |
| Incarcerated in Prison or Jail†                                  |                |               |              |              |               | <0.001 |
| Yes                                                              | 816 (18.21%)   | 60 (7.83%)    | *            | *            | 39 (10.74%)   |        |
| No                                                               | 3,665 (81.79%) | 706 (92.17%)  | *            | *            | 324 (89.26%)  |        |
| Homelessness†                                                    |                |               |              |              |               | <0.001 |
| Yes                                                              | 1,168 (26.07%) | 87 (11.36%)   | *            | *            | 48 (13.22%)   |        |
| No                                                               | 3,313 (73.93%) | 679 (88.64%)  | *            | *            | 315 (86.78%)  |        |
| Adequacy of Prenatal Care                                        |                |               |              |              |               | <0.001 |
| Less than Adequate                                               | 1,909 (42.60%) | 293 (38.25%)  | *            | 17 (19.54%)  | 110 (30.30%)  |        |
| Adequate                                                         | 1,208 (26.96%) | 221 (28.85%)  | *            | 32 (36.78%)  | 112 (30.85%)  |        |
| Intensive                                                        | 1,364 (30.44%) | 252 (32.90%)  | 45 (56.96%)  | 38 (43.68%)  | 141 (38.84%)  |        |
| <b>Opioid Related Variables in Pregnancy</b>                     |                |               |              |              |               |        |
| Public Addiction Treatment Program Enrollment for Opioid Problem |                |               |              |              |               | <0.001 |
| Yes                                                              | 1,418 (31.64%) | 0 (0.00%)     | 0 (0.00%)    | 0 (0.00%)    | 0 (0.00%)     |        |
| No                                                               | 3,063 (68.36%) | 766 (100.00%) | 79 (100.00%) | 87 (100.00%) | 363 (100.00%) |        |
| OUD Diagnosis                                                    |                |               |              |              |               | <0.001 |
| Yes                                                              | 3,407 (76.03%) | 0 (0.00%)     | 0 (0.00%)    | 0 (0.00%)    | 363 (100.00%) |        |
| No                                                               | 1,074 (23.97%) | 766 (100.00%) | 79 (100.00%) | 87 (100.00%) | 0 (0.00%)     |        |
| Overdose Event                                                   |                |               |              |              |               | <0.001 |
| Yes                                                              | 102 (2.28%)    | 0 (0.00%)     | 0 (0.00%)    | 0 (0.00%)    | 0 (0.00%)     |        |
| No                                                               | 4,379 (97.72%) | 766 (100.00%) | 79 (100.00%) | 87 (100.00%) | 363 (100.00%) |        |
| Medication for OUD                                               |                |               |              |              |               | <0.001 |
| Buprenorphine                                                    | 1,752 (39.10%) | 0 (0.00%)     | 0 (0.00%)    | 0 (0.00%)    | 0 (0.00%)     |        |
| Methadone                                                        | 1,434 (32.00%) | 0 (0.00%)     | 0 (0.00%)    | 0 (0.00%)    | 0 (0.00%)     |        |
| Both                                                             | 285 (6.36%)    | 0 (0.00%)     | 0 (0.00%)    | 0 (0.00%)    | 0 (0.00%)     |        |
| None                                                             | 1,010 (22.54%) | 766 (100.00%) | 79 (100.00%) | 87 (100.00%) | 363 (100.00%) |        |
| Any Opioid Prescription (Excluding Bup) (3MB)                    |                |               |              |              |               | <0.001 |
| Yes                                                              | 183 (4.08%)    | 0 (0.00%)     | *            | 87 (100.00%) | 21 (5.79%)    |        |
| No                                                               | 4,298 (95.92%) | 766 (100.00%) | *            | 0 (0.00%)    | 342 (94.21%)  |        |

|                                                                                                                                                    |                |               |              |              |               |        |
|----------------------------------------------------------------------------------------------------------------------------------------------------|----------------|---------------|--------------|--------------|---------------|--------|
| Infant NAS Diagnosis                                                                                                                               |                |               |              |              |               | <0.001 |
| Yes                                                                                                                                                | 2,123 (47.38%) | 766 (100.00%) | 79 (100.00%) | 87 (100.00%) | 0 (0.00%)     |        |
| No                                                                                                                                                 | 2,358 (52.62%) | 0 (0.00%)     | 0 (0.00%)    | 0 (0.00%)    | 363 (100.00%) |        |
| *Non-zero cells with < 11 deliveries along with next smallest cell have been suppressed in accordance with privacy rules                           |                |               |              |              |               |        |
| †At any time in 2011-2015                                                                                                                          |                |               |              |              |               |        |
| 3MB = In the last three months before delivery, ED=Emergency Department; OUD = Opioid Use Disorder; NAS=neonatal abstinence syndrome; Tx=treatment |                |               |              |              |               |        |

**eTable 4.** Characteristics of Mothers with Opioid Use Disorder by Treatment Category During Pregnancy (N = 5247)

|                                                                              | Any MOUD Treatment<br>(n=3,471) | ≥ 6 Consistent Months<br>(n = 1,999) | Any Other Treatment<br>(n = 1,472) | No Treatment<br>(n = 1,776) | P-Value<br>(2 group) | P-Value<br>(3 group) |
|------------------------------------------------------------------------------|---------------------------------|--------------------------------------|------------------------------------|-----------------------------|----------------------|----------------------|
| <b>Demographics</b>                                                          |                                 |                                      |                                    |                             |                      |                      |
| Maternal Age                                                                 |                                 |                                      |                                    |                             | <0.001               | <0.001               |
| ≤ 25 years old                                                               | 919 (26.48%)                    | 477 (23.86%)                         | 442 (30.03%)                       | 571 (32.15%)                |                      |                      |
| 26-34 years old                                                              | 2,130 (61.37%)                  | 1,272 (63.63%)                       | 858 (58.29%)                       | 922 (51.91%)                |                      |                      |
| ≥ 35 years old                                                               | 422 (12.16%)                    | 250 (12.51%)                         | 172 (11.68%)                       | 283 (15.93%)                |                      |                      |
| Maternal Race/Ethnicity                                                      |                                 |                                      |                                    |                             | <0.001               | <0.001               |
| White non-Hispanic                                                           | 3,135 (90.32%)                  | 1,847 (92.40%)                       | 1,288 (87.50%)                     | 1,416 (79.73%)              |                      |                      |
| Black non-Hispanic                                                           | 108 (3.11%)                     | 42 (2.10%)                           | 66 (4.48%)                         | 126 (7.09%)                 |                      |                      |
| Hispanic                                                                     | 228 (6.57%)                     | 110 (5.50%)                          | 118 (8.02%)                        | 234 (13.18%)                |                      |                      |
| Maternal Education                                                           |                                 |                                      |                                    |                             | 0.870                | 0.311                |
| High school or less                                                          | 1,863 (53.67%)                  | 1,095 (54.78%)                       | 768 (52.17%)                       | 949 (53.43%)                |                      |                      |
| Some college or more                                                         | 1,608 (46.33%)                  | 904 (45.22%)                         | 704 (47.83%)                       | 827 (46.57%)                |                      |                      |
| MassHealth Delivery                                                          |                                 |                                      |                                    |                             | <0.001               | <0.001               |
| Yes                                                                          | 3,231 (93.09%)                  | 1,889 (94.50%)                       | 1,342 (91.17%)                     | 1,475 (83.05%)              |                      |                      |
| No                                                                           | 240 (6.91%)                     | 110 (5.50%)                          | 130 (8.83%)                        | 301 (16.95%)                |                      |                      |
| Marital Status                                                               |                                 |                                      |                                    |                             | <0.001               | <0.001               |
| Married                                                                      | 517 (14.89%)                    | 289 (14.46%)                         | 228 (15.49%)                       | 397 (22.35%)                |                      |                      |
| Unmarried                                                                    | 2,954 (85.11%)                  | 1,710 (85.54%)                       | 1,244 (84.51%)                     | 1,379 (77.65%)              |                      |                      |
| Rural/Urban Residence                                                        |                                 |                                      |                                    |                             | <0.001               | <0.001               |
| Urban                                                                        | 3,078 (88.68%)                  | 1,751 (87.59%)                       | 1,327 (90.15%)                     | 1,632 (91.89%)              |                      |                      |
| Rural                                                                        | 393 (11.32%)                    | 248 (12.41%)                         | 145 (9.85%)                        | 114 (8.11%)                 |                      |                      |
| <b>Psychosocial Characteristics and Health Care Utilization in Pregnancy</b> |                                 |                                      |                                    |                             |                      |                      |
| ED Visits                                                                    |                                 |                                      |                                    |                             | 0.012                | 0.038                |
| 3 or More                                                                    | 590 (17.00%)                    | 345 (17.26%)                         | 245 (16.64%)                       | 352 (19.82%)                |                      |                      |
| < 3 visits                                                                   | 2,881 (83.00%)                  | 1,654 (82.74%)                       | 1,227 (83.36%)                     | 1,424 (80.18%)              |                      |                      |
| Anxiety Diagnosis                                                            |                                 |                                      |                                    |                             | 0.819                | 0.165                |

|                                                                  |                |                |                |                 |        |        |
|------------------------------------------------------------------|----------------|----------------|----------------|-----------------|--------|--------|
| Yes                                                              | 848 (24.43%)   | 512 (25.61%)   | 336 (22.83%)   | 439 (24.72%)    |        |        |
| No                                                               | 2,623 (75.57%) | 1,487 (74.39%) | 1,136 (77.17%) | 1,337 (75.28%)  |        |        |
| Depression Diagnosis                                             |                |                |                |                 | 0.036  | 0.109  |
| Yes                                                              | 948 (27.31%)   | 548 (27.41%)   | 400 (27.17%)   | 534 (30.07%)    |        |        |
| No                                                               | 2,523 (72.69%) | 1,451 (72.59%) | 1,072 (72.83%) | 1,242 (69.93%)  |        |        |
| Incarcerated in Prison or Jail†                                  |                |                |                |                 | 0.197  | <0.001 |
| Yes                                                              | 596 (17.17%)   | 299 (14.96%)   | 297 (20.18%)   | 280 (15.77%)    |        |        |
| No                                                               | 2,875 (82.83%) | 1,700 (85.04%) | 1,175 (79.82%) | 1,496 (84.23%)  |        |        |
| Homelessness†                                                    |                |                |                |                 | 0.003  | 0.003  |
| Yes                                                              | 873 (25.15%)   | 480 (24.01%)   | 393 (26.70%)   | 382 (21.51%)    |        |        |
| No                                                               | 2598 (74.85%)  | 1,519 (75.99%) | 1,079 (73.30%) | 1,394 (78.49%)  |        |        |
| Adequacy of Prenatal Care                                        |                |                |                |                 | 0.115  | <0.001 |
| Less than Adequate                                               | 1,425 (41.05%) | 715 (35.77%)   | 602 (30.12%)   | 682 (34.12%)    |        |        |
| Adequate                                                         | 972 (28.00%)   | 710 (48.23%)   | 370 (25.14%)   | 392 (26.63%)    |        |        |
| Intensive                                                        | 1,074 (30.94%) | 777 (43.75%)   | 457 (25.73%)   | 542 (30.52%)    |        |        |
| <b>Opioid Related Variables in Pregnancy</b>                     |                |                |                |                 |        |        |
| Public Addiction Treatment Program Enrollment for Opioid Problem |                |                |                |                 | <0.001 | <0.001 |
| Yes                                                              | 1,082 (31.17%) | 546 (27.31%)   | 536 (36.41%)   | 336 (18.92%)    |        |        |
| No                                                               | 2,389 (68.83%) | 1,453 (72.69%) | 936 (63.59%)   | 1,440 (81.08%)  |        |        |
| OUD Diagnosis                                                    |                |                |                |                 | <0.001 | <0.001 |
| Yes                                                              | 2,549 (73.44%) | 1,547 (77.39%) | 1,002 (68.07%) | 858 (48.31%)    |        |        |
| No                                                               | 922 (26.56%)   | 452 (22.61%)   | 470 (31.93%)   | 918 (51.69%)    |        |        |
| Overdose Event                                                   |                |                |                |                 | 0.344  | 0.045  |
| Yes                                                              | 63 (1.82%)     | 27 (1.35%)     | 36 (2.45%)     | 39 (2.20%)      |        |        |
| No                                                               | 3,408 (98.18%) | 1,972 (98.65%) | 1,436 (97.55%) | 1,737 (97.80%)  |        |        |
| Medication for OUD                                               |                |                |                |                 | <0.001 | <0.001 |
| Buprenorphine                                                    | 1,752 (50.48%) | 959 (47.97%)   | 793 (53.87%)   | 0 (0.00%)       |        |        |
| Methadone                                                        | 1,434 (41.31%) | 873 (43.67%)   | 561 (38.11%)   | 0 (0.00%)       |        |        |
| Both                                                             | 285 (8.21%)    | 167 (8.35%)    | 118 (8.02%)    | 0 (0.00%)       |        |        |
| None                                                             | 0 (0.00%)      | 0 (0.00%)      | 0 (0.00%)      | 1,776 (100.00%) |        |        |

|                                                         |                |                |               |                |        |        |
|---------------------------------------------------------|----------------|----------------|---------------|----------------|--------|--------|
| Any Opioid Prescription (Excluding Buprenorphine) (3MB) |                |                |               |                | <0.001 | <0.001 |
| Yes                                                     | 90 (2.59%)     | 44 (2.20%)     | 46 (3.13%)    | 93 (5.24%)     |        |        |
| No                                                      | 3,381 (97.41%) | 1,955 (97.80%) | 1,426(96.88%) | 1,683 (94.76%) |        |        |
| Infant NAS Diagnosis                                    |                |                |               |                | <0.001 | <0.001 |
| Yes                                                     | 1,696 (48.86%) | 1,006 (50.33%) | 690 (46.88%)  | 1,193 (67.17%) |        |        |
| No                                                      | 1,775 (51.14%) | 993 (49.67%)   | 782 (53.13%)  | 583 (32.83%)   |        |        |

† At any time in 2011-2015

3MB= In the last three months before delivery; ED=Emergency Department; OUD = Opioid Use Disorder; NAS=neonatal abstinence syndrome

**eTable 5.** Characteristics of Mothers Receiving Medication for Opioid Use Disorder by Medication Type (n = 3471)

|                                                                              | Buprenorphine<br>(n=1,752) | Methadone (w/ both)<br>(n=1,719) | Methadone (w/o both)<br>(n=1,434) | P-Value<br>(3<br>group) | P-Value<br>(2 group) |
|------------------------------------------------------------------------------|----------------------------|----------------------------------|-----------------------------------|-------------------------|----------------------|
| <b>Demographics</b>                                                          |                            |                                  |                                   |                         |                      |
| Maternal Age                                                                 |                            |                                  |                                   | 0.191                   | 0.066                |
| ≤ 25 years old                                                               | 463 (26.43%)               | 456 (26.53%)                     | 380 (26.50%)                      |                         |                      |
| 26-34 years old                                                              | 1,054 (60.16%)             | 1,076 (62.59%)                   | 902 (62.90%)                      |                         |                      |
| ≥ 35 years old                                                               | 235 (13.41%)               | 187 (10.88%)                     | 152 (10.60%)                      |                         |                      |
| Maternal Race/Ethnicity                                                      |                            |                                  |                                   | 0.002                   | <0.001               |
| White non-Hispanic                                                           | 1,617 (92.29%)             | 1,518 (88.31%)                   | 1,265 (88.21%)                    |                         |                      |
| Black non-Hispanic                                                           | 39 (2.23%)                 | 69 (4.01%)                       | 59 (4.11%)                        |                         |                      |
| Hispanic                                                                     | 96 (5.48%)                 | 132 (7.68%)                      | 110 (7.67%)                       |                         |                      |
| Maternal Education                                                           |                            |                                  |                                   | <0.001                  | <0.001               |
| High school or less                                                          | 867 (49.49%)               | 996 (57.94%)                     | 830 (57.88%)                      |                         |                      |
| Some college or more                                                         | 885 (50.51%)               | 723 (42.06%)                     | 604 (42.12%)                      |                         |                      |
| MassHealth Delivery                                                          |                            |                                  |                                   | <0.001                  | <0.001               |
| Yes                                                                          | 1,541 (87.96%)             | 1,690 (98.31%)                   | 1,411 (98.40%)                    |                         |                      |
| No                                                                           | 211 (12.04%)               | 29 (1.69%)                       | 23 (1.60%)                        |                         |                      |
| Marital Status                                                               |                            |                                  |                                   | 0.054                   | 0.056                |
| Married                                                                      | 281 (16.04%)               | 236 (13.73%)                     | 205 (14.30%)                      |                         |                      |
| Unmarried                                                                    | 1,471 (83.96%)             | 1,483 (86.27%)                   | 1,229 (85.70%)                    |                         |                      |
| Rural/Urban Residence                                                        |                            |                                  |                                   | <0.001                  | <0.001               |
| Urban                                                                        | 1,507 (86.02%)             | 1,571 (91.39%)                   | 1,303 (90.86%)                    |                         |                      |
| Rural                                                                        | 245 (13.98%)               | 148 (8.61%)                      | 131 (9.14%)                       |                         |                      |
| <b>Psychosocial Characteristics and Health Care Utilization in Pregnancy</b> |                            |                                  |                                   |                         |                      |
| ED Visits                                                                    |                            |                                  |                                   | <0.001                  | <0.001               |
| 3 or More                                                                    | 251 (14.33%)               | 339 (19.72%)                     | 277 (19.32%)                      |                         |                      |
| < 3 visits                                                                   | 1,501 (85.67%)             | 1,380 (80.28%)                   | 1,157 (80.68%)                    |                         |                      |
| Anxiety Diagnosis                                                            |                            |                                  |                                   | <0.001                  | 0.342                |
| Yes                                                                          | 416 (23.74%)               | 432 (25.13%)                     | 333 (23.22%)                      |                         |                      |
| No                                                                           | 1,336 (76.26%)             | 1,287 (74.87%)                   | 1,101 (76.78%)                    |                         |                      |
| Depression Diagnosis                                                         |                            |                                  |                                   | 0.23                    | 0.423                |

|                                                                  |                |                |                |        |        |
|------------------------------------------------------------------|----------------|----------------|----------------|--------|--------|
| Yes                                                              | 468 (26.71%)   | 480 (27.92%)   | 390 (27.20%)   |        |        |
| No                                                               | 1,284 (73.29%) | 1,239 (72.08%) | 1,044 (72.80%) |        |        |
| Incarcerated in Prison or Jail†                                  |                |                |                | <0.001 | <0.001 |
| Yes                                                              | 224 (12.79%)   | 372 (21.64%)   | 294 (20.50%)   |        |        |
| No                                                               | 1,528 (87.21%) | 1,347 (78.36%) | 1,140 (79.50%) |        |        |
| Homelessness†                                                    |                |                |                | <0.001 | <0.001 |
| Yes                                                              | 327 (18.66%)   | 546 (31.76%)   | 433 (30.20%)   |        |        |
| No                                                               | 1,425 (81.34%) | 1,173 (68.24%) | 1,001 (69.80%) |        |        |
| Adequacy of Prenatal Care                                        |                |                |                | <0.001 | <0.001 |
| Less than Adequate                                               | 652 (37.21%)   | 773 (44.97%)   | 630 (43.93%)   |        |        |
| Adequate                                                         | 556 (31.74%)   | 416 (24.20%)   | 353 (24.62%)   |        |        |
| Intensive                                                        | 544 (31.05%)   | 530 (30.83%)   | 451 (31.45%)   |        |        |
| <b>Opioid Related Variables in Pregnancy</b>                     |                |                |                |        |        |
| Public Addiction Treatment Program Enrollment for Opioid Problem |                |                |                | <0.001 | <0.001 |
| Yes                                                              | 239 (13.64%)   | 876 (50.96%)   | 627 (43.72%)   |        |        |
| No                                                               | 1,513 (86.36%) | 843 (49.04%)   | 807 (56.28%)   |        |        |
| OUD Diagnosis                                                    |                |                |                | 0.001  | 0.001  |
| Yes                                                              | 1,241 (70.83%) | 1,308 (76.09%) | 1,083 (75.52%) |        |        |
| No                                                               | 511 (29.17%)   | 411 (23.91%)   | 351 (24.48%)   |        |        |
| Overdose Event                                                   |                |                |                | <0.001 | <0.001 |
| Yes                                                              | 15 (0.86%)     | 48 (2.79%)     | 36 (2.51%)     |        |        |
| No                                                               | 1,737 (99.14%) | 1,671 (97.21%) | 1,398 (97.49%) |        |        |
| Any Opioid Prescription (Excluding Bup) (3MB)                    |                |                |                | <0.001 | <0.001 |
| Yes                                                              | 67 (3.82%)     | 23 (1.34%)     | 19 (1.32%)     |        |        |
| No                                                               | 1,685 (96.18%) | 1,696 (98.66%) | 1,415 (98.68%) |        |        |
| Infant NAS Diagnosis                                             |                |                |                | <0.001 | <0.001 |
| Yes                                                              | 781 (44.58%)   | 915 (53.23%)   | 757 (52.79%)   |        |        |
| No                                                               | 971 (55.42%)   | 804 (46.77%)   | 677 (47.21%)   |        |        |

† At any time in 2011-2015

3MB= In the last three months before delivery; ED=Emergency Department; OUD = Opioid Use Disorder; NAS=neonatal abstinence syndrome

**eTable 6.** Unadjusted and Adjusted Odds of Use and Type of Medication to treat Opioid Use Disorder (Sensitivity Analysis—No NAS Only)

|                                                                                                        | OR (95% CI)      | aOR* (95% CI)    | aOR** (95% CI)     |                  | Pseudo R <sup>2</sup><br>Full<br>Model | Pseudo R <sup>2</sup><br>w/o<br>interaction | Pseudo R <sup>2</sup> -<br>w/o<br>race/ethnicity |
|--------------------------------------------------------------------------------------------------------|------------------|------------------|--------------------|------------------|----------------------------------------|---------------------------------------------|--------------------------------------------------|
| <b>Any Treatment Use</b>                                                                               |                  |                  |                    |                  |                                        |                                             |                                                  |
| White non-Hispanic                                                                                     | 1.00 (reference) | 1.00 (reference) | 1.00 (reference)   |                  | 0.059                                  | 0.059                                       | 0.053                                            |
| Black non-Hispanic                                                                                     | 0.59 (0.42-0.82) | 0.58 (0.41-0.83) | 0.58 (0.41-0.83)   |                  |                                        |                                             |                                                  |
| Hispanic                                                                                               | 0.68 (0.53-0.87) | 0.66 (0.51-0.85) | 0.66 (0.51-0.85)   |                  |                                        |                                             |                                                  |
| <b>Consistent Use v. None</b>                                                                          |                  |                  |                    |                  |                                        |                                             |                                                  |
| White non-Hispanic                                                                                     | 1.00 (reference) | 1.00 (reference) | 1.00 (reference)   |                  | 0.061                                  | 0.061                                       | 0.050                                            |
| Black non-Hispanic                                                                                     | 0.39 (0.26-0.59) | 0.38 (0.25-0.58) | 0.38 (0.25-0.58)   |                  |                                        |                                             |                                                  |
| Hispanic                                                                                               | 0.56 (0.42-0.74) | 0.53 (0.40-0.71) | 0.53 (0.40-0.71)   |                  |                                        |                                             |                                                  |
| <b>Consistent Use v. Inconsistent Use</b>                                                              |                  |                  |                    |                  |                                        |                                             |                                                  |
| White non-Hispanic                                                                                     | 1.00 (reference) | 1.00 (reference) | 1.00 (reference)   |                  | 0.061                                  | 0.061                                       | 0.050                                            |
| Black non-Hispanic                                                                                     | 0.44 (0.30-0.66) | 0.44 (0.30-0.65) | 0.44 (0.30-0.65)   |                  |                                        |                                             |                                                  |
| Hispanic                                                                                               | 0.65 (0.50-0.85) | 0.63 (0.48-0.82) | 0.63 (0.48-0.82)   |                  |                                        |                                             |                                                  |
| <b>Buprenorphine vs. Any Methadone</b>                                                                 |                  |                  |                    |                  |                                        |                                             |                                                  |
| White non-Hispanic                                                                                     | 1.00 (reference) | 1.00 (reference) | 1.00 (reference)   |                  | 0.106                                  | 0.103                                       | 0.096                                            |
| Black non-Hispanic                                                                                     | 0.53 (0.36-0.79) | 0.58 (0.39-0.87) | Anx/Dep in Preg    | 1.20 (0.61-2.37) |                                        |                                             |                                                  |
|                                                                                                        |                  |                  | No Anx/Dep in Preg | 0.39 (0.23-0.66) |                                        |                                             |                                                  |
| Hispanic                                                                                               | 0.68 (0.52-0.90) | 0.77 (0.58-1.01) | Anx/Dep in Preg    | 1.13 (0.73-1.76) |                                        |                                             |                                                  |
|                                                                                                        |                  |                  | No Anx/Dep in Preg | 0.60 (0.42-0.86) |                                        |                                             |                                                  |
| <b>Buprenorphine v. None</b>                                                                           |                  |                  |                    |                  |                                        |                                             |                                                  |
| White non-Hispanic                                                                                     | 1.00 (reference) | 1.00 (reference) | 1.00 (reference)   |                  | 0.106                                  | 0.103                                       | 0.096                                            |
| Black non-Hispanic                                                                                     | 0.41 (0.27-0.63) | 0.43 (0.28-0.66) | Anx/Dep in Preg    | 0.63 (0.33-1.20) |                                        |                                             |                                                  |
|                                                                                                        |                  |                  | No Anx/Dep in Preg | 0.34 (0.19-0.60) |                                        |                                             |                                                  |
| Hispanic                                                                                               | 0.55 (0.41-0.74) | 0.57 (0.42-0.78) | Anx/Dep in Preg    | 0.85 (0.54-1.35) |                                        |                                             |                                                  |
|                                                                                                        |                  |                  | No Anx/Dep in Preg | 0.43 (0.29-0.64) |                                        |                                             |                                                  |
| <b>Buprenorphine vs. Exclusively Methadone (excluding individuals receiving both medication types)</b> |                  |                  |                    |                  |                                        |                                             |                                                  |
| White non-Hispanic                                                                                     | 1.00 (reference) | 1.00 (reference) | 1.00 (reference)   |                  | 0.106                                  | 0.103                                       | 0.096                                            |

|                                                                                                                                                                                                                             |                  |                  |                    |                  |  |  |  |
|-----------------------------------------------------------------------------------------------------------------------------------------------------------------------------------------------------------------------------|------------------|------------------|--------------------|------------------|--|--|--|
| Black non-Hispanic                                                                                                                                                                                                          | 0.52 (0.34-0.78) | 0.57 (0.37-0.86) | Anx/Dep in Preg    | 1.15 (0.56-2.34) |  |  |  |
|                                                                                                                                                                                                                             |                  |                  | No Anx/Dep in Preg | 0.39 (0.22-0.66) |  |  |  |
| Hispanic                                                                                                                                                                                                                    | 0.68 (0.51-0.91) | 0.77 (0.57-1.02) | Anx/Dep in Preg    | 1.10 (0.69-1.76) |  |  |  |
|                                                                                                                                                                                                                             |                  |                  | No Anx/Dep in Preg | 0.61 (0.42-0.88) |  |  |  |
| Anx/Dep= Anxiety and/or Depression diagnosis; OR=Odds Ratio                                                                                                                                                                 |                  |                  |                    |                  |  |  |  |
| * Adjusted for age, education, rural residence, MassHealth enrollment, depression/anxiety diagnosis, ED service utilization, and opioid prescription during last trimester of pregnancy                                     |                  |                  |                    |                  |  |  |  |
| ** Adjusted for age, education, rural residence, MassHealth enrollment, depression/anxiety diagnosis, ED service utilization, opioid prescription during last trimester of pregnancy, and any significant interaction terms |                  |                  |                    |                  |  |  |  |

**eTable 7. Unadjusted and Adjusted Odds of Use and Type of Medication for Opioid Use Disorder (Sensitivity Analysis—No Exclusions)**

|                                           | OR (95% CI)      | aOR* (95% CI)    | aOR** (95% CI)     |                   | Pseudo R-Square - Full Model | Pseudo R-Square - w/o interaction | Pseudo R-Square - w/o race/ethnicity |
|-------------------------------------------|------------------|------------------|--------------------|-------------------|------------------------------|-----------------------------------|--------------------------------------|
| <b>Any Treatment Use</b>                  |                  |                  |                    |                   |                              |                                   |                                      |
| White non-Hispanic                        | 1.00 (reference) | 1.00 (reference) | 1.00 (reference)   |                   | 0.106                        | 0.101                             | 0.073                                |
| Black non-Hispanic                        | 0.41 (0.32-0.52) | 0.38 (0.30-0.50) | ≤ 25   Rural       | 0.80 (0.14-4.51)  |                              |                                   |                                      |
|                                           |                  |                  | ≤ 25   Urban       | 0.21 (0.12-0.35)  |                              |                                   |                                      |
|                                           |                  |                  | 26-34   Rural      | 1.86 (0.30-11.50) |                              |                                   |                                      |
|                                           |                  |                  | 26-34   Urban      | 0.48 (0.34-0.69)  |                              |                                   |                                      |
|                                           |                  |                  | ≥ 35   Rural       | 1.65 (0.25-11.00) |                              |                                   |                                      |
|                                           |                  |                  | ≥ 35   Urban       | 0.43 (0.23-0.80)  |                              |                                   |                                      |
| Hispanic                                  | 0.46 (0.38-0.55) | 0.43 (0.36-0.52) | ≤ 25   Rural       | 0.90 (0.30-2.73)  |                              |                                   |                                      |
|                                           |                  |                  | ≤ 25   Urban       | 0.28 (0.19-0.40)  |                              |                                   |                                      |
|                                           |                  |                  | 26-34   Rural      | 1.51 (0.50-4.58)  |                              |                                   |                                      |
|                                           |                  |                  | 26-34   Urban      | 0.46 (0.36-0.60)  |                              |                                   |                                      |
|                                           |                  |                  | ≥ 35   Rural       | 1.92 (0.59-6.28)  |                              |                                   |                                      |
|                                           |                  |                  | ≥ 35   Urban       | 0.59 (0.37-0.93)  |                              |                                   |                                      |
| <b>Consistent Use v. No Treatment</b>     |                  |                  |                    |                   |                              |                                   |                                      |
| White non-Hispanic                        | 1.00 (reference) | 1.00 (reference) | 1.00 (reference)   |                   | 0.101                        | 0.099                             | 0.070                                |
| Black non-Hispanic                        | 0.27 (0.19-0.38) | 0.25 (0.18-0.36) | Anx/Dep in Preg    | 0.37 (0.21-0.65)  |                              |                                   |                                      |
|                                           |                  |                  | No Anx/Dep in Preg | 0.20 (0.13-0.32)  |                              |                                   |                                      |
| Hispanic                                  | 0.37 (0.30-0.47) | 0.35 (0.28-0.44) | Anx/Dep in Preg    | 0.52 (0.36-0.75)  |                              |                                   |                                      |
|                                           |                  |                  | No Anx/Dep in Preg | 0.27 (0.20-0.37)  |                              |                                   |                                      |
| <b>Consistent Use v. Inconsistent Use</b> |                  |                  |                    |                   |                              |                                   |                                      |
| White non-Hispanic                        | 1.00 (reference) | 1.00 (reference) | 1.00 (reference)   |                   | 0.101                        | 0.099                             | 0.070                                |
| Black non-Hispanic                        | 0.44 (0.30-0.66) | 0.44 (0.30-0.66) | Anx/Dep in Preg    | 0.72 (0.37-1.42)  |                              |                                   |                                      |
|                                           |                  |                  | No Anx/Dep in Preg | 0.34 (0.21-0.56)  |                              |                                   |                                      |
| Hispanic                                  | 0.65 (0.50-0.85) | 0.64 (0.49-0.84) | Anx/Dep in Preg    | 0.87 (0.56-1.35)  |                              |                                   |                                      |
|                                           |                  |                  | No Anx/Dep in Preg | 0.52 (0.37-0.74)  |                              |                                   |                                      |
| <b>Buprenorphine vs. Any Methadone</b>    |                  |                  |                    |                   |                              |                                   |                                      |

|                                                                                                                                                                                                                             |                  |                  |                    |                  |       |       |       |
|-----------------------------------------------------------------------------------------------------------------------------------------------------------------------------------------------------------------------------|------------------|------------------|--------------------|------------------|-------|-------|-------|
| White non-Hispanic                                                                                                                                                                                                          | 1.00 (reference) | 1.00 (reference) | 1.00 (reference)   |                  | 0.132 | 0.128 | 0.104 |
| Black non-Hispanic                                                                                                                                                                                                          | 0.53 (0.36-0.79) | 0.60 (0.40-0.89) | Anx/Dep in Preg    | 1.23 (0.62-2.41) |       |       |       |
|                                                                                                                                                                                                                             |                  |                  | No Anx/Dep in Preg | 0.41 (0.24-0.69) |       |       |       |
| Hispanic                                                                                                                                                                                                                    | 0.68 (0.52-0.90) | 0.77 (0.58-1.01) | Anx/Dep in Preg    | 1.15 (0.74-1.78) |       |       |       |
|                                                                                                                                                                                                                             |                  |                  | No Anx/Dep in Preg | 0.59 (0.42-0.85) |       |       |       |
|                                                                                                                                                                                                                             |                  |                  | No Anx/Dep in Preg | 0.47 (0.36-0.62) |       |       |       |
| <b>Buprenorphine v. None</b>                                                                                                                                                                                                |                  |                  |                    |                  |       |       |       |
| White non-Hispanic                                                                                                                                                                                                          | 1.00 (reference) | 1.00 (reference) | 1.00 (reference)   |                  | 0.132 | 0.128 | 0.104 |
| Black non-Hispanic                                                                                                                                                                                                          | 0.29 (0.20-0.41) | 0.29 (0.20-0.41) | Anx/Dep in Preg    | 0.48 (0.27-0.83) |       |       |       |
|                                                                                                                                                                                                                             |                  |                  | No Anx/Dep in Preg | 0.21 (0.13-0.34) |       |       |       |
| Hispanic                                                                                                                                                                                                                    | 0.37 (0.29-0.47) | 0.38 (0.29-0.48) | Anx/Dep in Preg    | 0.59 (0.41-0.86) |       |       |       |
|                                                                                                                                                                                                                             |                  |                  | No Anx/Dep in Preg | 0.28 (0.20-0.39) |       |       |       |
| <b>Buprenorphine vs. Exclusively Methadone (excluding individuals receiving both medication types)</b>                                                                                                                      |                  |                  |                    |                  |       |       |       |
| White non-Hispanic                                                                                                                                                                                                          | 1.00 (reference) | 1.00 (reference) | 1.00 (reference)   |                  | 0.129 | 0.126 | 0.101 |
| Black non-Hispanic                                                                                                                                                                                                          | 0.52 (0.34-0.78) | 0.58 (0.39-0.89) | Anx/Dep in Preg    | 1.17 (0.57-2.39) |       |       |       |
|                                                                                                                                                                                                                             |                  |                  | No Anx/Dep in Preg | 0.41 (0.24-0.69) |       |       |       |
| Hispanic                                                                                                                                                                                                                    | 0.68 (0.51-0.91) | 0.77 (0.58-1.02) | Anx/Dep in Preg    | 1.12 (0.70-1.77) |       |       |       |
|                                                                                                                                                                                                                             |                  |                  | No Anx/Dep in Preg | 0.60 (0.42-0.87) |       |       |       |
|                                                                                                                                                                                                                             |                  |                  | No Anx/Dep in Preg | 0.28 (0.20-0.39) |       |       |       |
| * Adjusted for age, education, rural residence, MassHealth enrollment, depression/anxiety diagnosis, ED service utilization, and opioid prescription during last trimester of pregnancy                                     |                  |                  |                    |                  |       |       |       |
| ** Adjusted for age, education, rural residence, MassHealth enrollment, depression/anxiety diagnosis, ED service utilization, opioid prescription during last trimester of pregnancy, and any significant interaction terms |                  |                  |                    |                  |       |       |       |

**eTable 8.** Sensitivity Analysis #3: Adjusted Odds of Type of Medication for Opioid Use Disorder, Excluding Women Who Received Both Methadone and Buprenorphine (Main Study Cohort, N = 5247)

|                                                                                                        | OR (95% CI)      | aOR* (95% CI)    | Pseudo R-Square - Full Model | Pseudo R-Square - w/o interaction | Pseudo R-Square - w/o race/ethnicity |
|--------------------------------------------------------------------------------------------------------|------------------|------------------|------------------------------|-----------------------------------|--------------------------------------|
| <b>Buprenorphine vs. Exclusively Methadone (excluding individuals receiving both medication types)</b> |                  |                  |                              |                                   |                                      |
| White non-Hispanic                                                                                     | 1.00 (reference) | 1.00 (reference) | 0.121                        | 0.116                             | 0.092                                |
| Black non-Hispanic                                                                                     | 0.52 (0.34-0.78) | 0.58 (0.39-0.89) |                              |                                   |                                      |
| Hispanic                                                                                               | 0.68 (0.51-0.91) | 0.77 (0.58-1.02) |                              |                                   |                                      |
| <b>Exclusive Methadone vs. None</b>                                                                    |                  |                  |                              |                                   |                                      |
| White non-Hispanic                                                                                     | 1.00 (reference) | 1.00 (reference) | 0.121                        | 0.116                             | 0.092                                |
| Black non-Hispanic                                                                                     | 0.52 (0.38-0.72) | 0.48 (0.34-0.66) |                              |                                   |                                      |
| Hispanic                                                                                               | 0.53 (0.41-0.67) | 0.48 (0.38-0.62) |                              |                                   |                                      |
